# Supplementary material for: A powerful approach reveals numerous expression quantitative trait haplotypes in multiple tissues
Source: Oxford University Press journal article supplement (doi:10.1093/bioinformatics/bty318), 2018-04-25
Supplement: bioinformatics_34_18_3145_s2.docx [file bioinformatics_34_18_3145_s2.docx]

**Supplementary methods, results, figures and tables**

**Supplementary methods:**

**1 Characterization of the eQTL haplotypes by chromatin states**

Every SNP in GTEx genotype data set was assigned a functional chromatin state according to chromatin states (Chromatin State Segmentation by HMM, ChromHMM) for human blood cells (GM12878). SNPs located in the following eight ChromHMM states were collected for further analysis: active, weak and inactive promoters, strong and weak enhancers in upstream or downstream of genes, and insulators. For each eQTL haplotype, all pairs of the collected tag SNPs were investigated according to the ChromHMM state pairs. For instance, five tag SNPs (S1, S2, S3, S4, S5) were in a specific eQTL haplotype and only 3 of them (S1, S2, S3) were located in the eight selected ChromHMM states. S1 was located in an active promoter state region, S2 was located in a strong enhancer state region, while S3 was located another strong enhancer state region. Then for this haplotype, 2 pairs were found in active promoter and strong enhancer combination, while 1 pair was found in strong enhancer and strong enhancer combination. By doing so, the numbers of tag SNP pairs of each state combination in each eQTL haplotypes were counted and summarized in a table for observed data. Then according to the number of SNP pairs found for each state, we calculated the expected number of SNP pairs for each state combination. The counting of the observed value from eQTL haplotypes and expected number were compared by ratio and were tested by Chi-square test for each of the state pairs.

**2 Application of eQTL haplotypes to tissue related GWAS studies**

Genotypes of 446,838 SNPs were collected from Rheumatoid Arthritis and control samples in WTCCC dataset, which contains 2,659 cases and 2,395 controls. To get the frequency of eQTL haplotypes in cases and controls, genotype from all samples were phased by SHAPEIT v2.837 with default parameter settings. Chi-square test was performed for each eQTL haplotype according to their frequency in cases and controls. The correlation of association *p* values of the eQTL haplotypes for gene expression and disease status was evaluated by linear regression analysis.

The same analysis were applied on genotypes Genome-Wide Association Study of Schizophrenia (GAIN) which contained 730,000 SNPs, 2,170 cases and 2,341 controls, with all eQTL haplotypes detected in GTEx brain tissue samples.

GWAS summary statistics of 8,253,617 chipped SNPs from a rheumatoid arthritis GWAS meta-analysis (Stahl et al. 2010), which consists of over 29,000 cases and 73,000 controls, were collected for comparison. SNPs in RA GWAS were separated into two groups according to its appearance in the tag SNPs of all eQTL haplotypes in GTEx whole blood. The association *p*-values of the two groups of SNPs were plotted and the difference of them was tested by Kolmogorov-Smirnov test.

Same analysis were applied to GWAS summary statistics of 9,444,231 SNPs in Psychiatric Genomics Consortium (PGC) (Schizophrenia Working Group of the Psychiatric Genomics 2014), which contains 36,989 individuals affected by schizophrenia and 113,075 controls, with all eQTL haplotypes detected in GTEx brain tissue samples.

**3 Association test of eQTL haplotype of *IRGM* in WTCCC data**

SNPs located in chr5:149,200,000-152,200,000 of 1748 WTCCC Crohn’s disease samples and 2395 controls were extracted and phased by SHAPEIT v2.837. The frequency of the eQTL haplotype (tagged by: rs2346026-C, rs62379700-A, rs17801675-G, rs34594711-T) was counted in cases and controls for chi-square test.

**4 GWAS signal enrichment for eQTL haplotype tag SNPs on relevant tissues**

GWAS summary statistics of 446,105 chipped SNPs from WTCCC 2,659 RA cases and 2,395 controls were calculated. *P*-values of the SNPs that overlap with eQTL haplotype tag SNPs (2,875 SNPs), were compared with the *p*-values of the other SNPs (443, 231 SNPs).

To further validate the enrichment of rheumatoid arthritis GWAS signals in whole blood eQTL haplotype tag SNPs, GWAS summary statistics of 8,253,617 chipped SNPs from a RA GWAS meta-analysis, which consists of over 29,000 cases and 73,000 controls collected for comparison. 13,496 of them were overlapping with the tag SNPs of whole blood eQTL haplotypes. All SNPs located in HLA region (chr6:25,000,000-34,000,000bp) were removed from the analysis, to avoid the biased influence of the comparison.

**5 Generation of random control regions for eQTL haplotype tag SNP selection**

We also prepared a set of random control regions for evaluating the contrition from regulatory regions. The start and end positions of all predicted critical regulatory regions generated from the main eQTL haplotype detection method were obtained for further analysis. For each region, the new start position was randomly assigned in the same chromosome and the end position was assigned as the new start position plus the length of the original region. The repositioning step was processed one region by one region for each chromosome. The step was repeated if the new region overlaps with any of previous repositioned regions. By doing so, the number of regions and the length of each region were consistent between the random regions and predicted critical regulatory regions.

Results

**1 Evaluation of the essentialness of the three haplotype number deduction steps of the proposed eQTL haplotype detection method.**

1.1 The effect of step 1: selection of gene regulatory regions according to regulatory score of variants in non-coding regions in eQTL haplotype analysis.

The eQTL haplotypes used in all above analysis were based on the prior selection of the tag SNPs in predicted gene regulatory regions. To evaluate the effect of such selection, we draw random regions with matched length and number of regions (detailed in Methods section) to perform the same analysis for comparison. The number of genes with eQTL haplotypes was reduced by 47% in top ten tissues and 43% in brain tissues (Table S1). Moreover, for the correlation of the GTEx whole blood eQTL haplotype association *p*-values in the RA GWAS and *p*-values with gene expression, the value was reduced from 0.19 at the regulatory regions to 0.15 at the random regions with decreased significance (*P*-value = 1.70×10-9, Figure S3). For the chromatin states pair enrichment test, the number of positively enriched state pair reduced from nine to seven while the significance level was also reduced due to the decreased total number of eQTL haplotypes identified. These results showed that the regulatory region guided strategy effectively enriched the informative interactions that influence gene expression.

In addition, we repeated the analysis in method 3.2 on an alternative eQTL haplotype set, which was generated from random regions rather than predicted critical regulatory regions. The result showed that only nine chromatin state combinations that were positively or negatively enriched, which was almost half of the enriched combinations found in eQTL haplotypes by the proposed method (7 vs. 16) (Table S2).

1.2 The effect of step 2: Exploration of informative haplotypes in regulatory regions for each gene.

To evaluate the effect of the strategies taken in this step, we compared the expected number of haplotypes with actual number for each gene. The expected number of haplotypes for each gene was calculated according to the number of candidate SNPs. Each SNP has only three statuses in a haplotype, which is absent, reference allele and alternative allele. So the expected number of haplotypes is 3^(Number of SNPs). Within all 16075 genes with regulatory SNPs, the median of SNPs is 77 and the median of expected haplotypes is 3.74×105, while the median of actual number of haplotypes is 4.99×104, which is around 6 times less than the expected number. Therefore, the filtering strategies taken in step 2 for informative haplotypes greatly reduced the total number of haplotypes.

1.3 The effect of step 3: Using effective number of haplotypes for eQTL haplotype *p*-value correction

To test the importance of using the effective number of haplotypes for eQTL haplotype *p*-value correction in each gene (method step 3), we repeated the analysis on whole blood by replacing the effective number of haplotypes with the total number of haplotypes for each gene, to apply the multiple testing corrections for the p values of each haplotype. As a result, 5,328 eQTL haplotypes were identified in 836 genes, which is 41% of the haplotypes and 35.2% of the genes identified by the original method. The result clearly showed the necessity of using effective number of haplotypes in the proposed detection of eQTL haplotype method.

**2 Investigation of the underlying phenomena of the observed enrichment in particular chromatin states pairs**

To further investigate the underlying phenomena of the observed enrichment. We calculated the percentage of insulator pairs with enhancer-promoter located in between, for all eQTL haplotypes and insignificant haplotypes. The result showed obvious difference between these two groups of haplotypes (78% and 56%), which provides further evidence that upstream and downstream insulators may cooperatively regulate an enhancer-promoter element. We also calculated the number of strong promoters that have interaction with weak promoters, have interaction with strong enhancers and have both types of interactions. By comparing the total number of strong promoters involved in eQTL haplotypes, 56% of the strong promoters have interaction with strong enhancer while 16% of them have interaction with weak promoter. The percentage of the strong promoters have both interaction types was 0.04, which is significantly different with the chance by random (0.09), with p value of 0.003 by ANOVA. The result suggesting a negative interaction of the two enrichment pairs, indicating that the weak promoters may replacing the role of enhancers in the activation of promoters in some genes.

**3 eQTL haplotypes of certain tissue tend to be associated with tissue related complex trait**

Previous studies shows that eQTL SNPs were significantly enriched in disease susceptibility SNPs with association significance, comparing to non-eQTL SNPs (G. T. Consortium 2015). It is important to study whether this feature is also conserved in the eQTL haplotypes and whether the tissues matter. We again selected the eQTL haplotypes from GTEx whole blood, to examine the correlation of a haplotype in two different scenarios. Each eQTL haplotype from GTEx whole bloods was tested for its association with Rheumatoid Arthritis (RA) by chi-square test in phased genotypes in WTCCC dataset (Wellcome Trust Case Control 2007), which contains 2659 cases and 2395 controls. As a result, the association level (-log(*p*-value)) of the haplotypes were positively correlated with the eQTL -log(*p*-value) with high significance (Spearman's rank correlation coefficient *r* = 0.190, *p* = 2.2x10-16) (Figure S2A). The same analysis was performed on eQTL haplotypes from brain tissues and their correlation with Schizophrenia (SCZ) in a GWAS, resulting highly significant correlation of the two association -log(*p*-values) (*r* = 0.183, p = 1.8x10-25) (Figure S2D). However, the correlation for brain eQTL haplotypes in RA GWAS, which was considered as unmatched trait, was reduced to 0.064 with insignificant *p*-value= 0.35 (Figure S2B). In another unmatched trait, the correlation for the whole blood eQTL haplotypes in the SCZ GWAS was also insignificant (Figure S2E). In addition, the correlation also disappeared when the phenotype label of the RA and SCZ case control samples were randomly assigned during association analysis (Figure S2C, F). Therefore, comparing to the four negative control analyses, the correlation between eQTL haplotypes and matched disease phenotypes is unlikely to be random and support the assumption that genes’ tissue specific expression regulation plays an important role in corresponding development of complex trait.

**4 GWAS signal enrichment for eQTL haplotype tag SNPs on related tissues**

With the assumption that tag SNPs of eQTL haplotypes may also contribute to the development of tissue matched diseases, we also checked their association in GWAS datasets. *P*-values of the SNPs in WTCCC RA GWAS and SNPs that overlap with whole blood eQTL haplotype tag SNPs, were compared and showed significantly difference with marginal *p*-value [*p* =0.029, K-S (Kolmogorov-Smirnov) test], indicating the correlation between the eQTL haplotypes and related disease (Figure S3A). Further comparison in an RA meta-analysis with larger sample size showed much higher significance of the enrichment (*p* = 2.2x10-16, Figure S3B). At the same time, because all tag SNPs are selected from the regulatory variants, it is necessary to know whether the enrichment is either from the selection of regulatory variants or from the further selection of eQTL haplotypes. As shown in Figure S3C (*p* = 1.9x10-5), the tag SNPs of blood eQTL haplotypes tend to be more significant than other regulatory variants in the RA meta-analysis study. In contrast, the whole blood eQTL haplotype tag SNPs were not enriched in a GWAS meta-study of schizophrenia (*p*-value =0.19, Figure S3D), which is considered as irrelevant with the whole blood.

Similarly, for the brain eQTL haplotypes, the tag SNPs were highly significantly enriched in associated variants of schizophrenia (*p* = 6.9x10-8, Figure S3F) but far less significant in the RA (*p* =0.0012, Figure S3H). These results suggest tissue matching is also important for individual marginal effects of tag SNPs on complex diseases.

**5 Example of eQTL haplotypes in epigenetic regions affects the expression of disease-associated gene**

To further illustrate the mechanisms of eQTL haplotypes affecting gene expression, we deeply investigated some eQTL haplotypes from whole blood. These eQTL haplotyps were with all tag SNPs located in histone modification hotspots (H3K4me3), derived from human blood cell lines (GM12878). One eQTL haplotype with four tag SNPs was found to be associated with the expression of *IRGM*, which is known to be associated with an important autoimmune disease: Crohn’s disease (OMIM 612278). All of the tag SNPs were located in the histone modification hotspots. Two were located in strong enhancer regions while the other two were located in promoter regions according to ChromHMM states (Figure S4A). The association of this eQTL haplotype with the expression of *IRGM* was 6.61x10-6 (<0.05 by multiple testing correction) (Figure S4B). We then further investigated the association of the eQTL haplotype with Crohn’s disease, by phasing the genotypes of the eQTL haplotype surrounding SNPs (upstream and downstream 1 MB) in WTCCC Crohn’s disease and control samples. Interestingly, the frequency of eQTL haplotype was 0.220 in cases and 0.191 in controls, with marginal significant *p* value of 0.017 (Figure S4C). This example illustrated that the interaction of the variants located in epigenetic markers may affect the expression of disease associated genes, and further affects the susceptibility of complex diseases.

**6 Evaluation of the proposed approach with alternative regulatory data**

We used a single set of data to define regulatory regions so that the result could be biased to data set specific regions. There are also some other data sets that can be used to define regulatory regions, such as Hi-C data. Using other data set could identify different set of eQTL haplotypes, which would bias to the input data set. However, many of the eQTL haplotypes would still be agreed by using different data set. An example of eQTL haplotype identified using the method described in this study, which was associated with *CCL21*, a well-known RA related gene, showed that the Hi-C interaction score of the tag SNP pairs were much higher than surrounding regions (Figure S5). This Hi-C data was from GM12878, which is from whole blood sample, a matched tissue for RA. This example indicates that the eQTL haplotypes detected based one single set of gene regulatory information data, could also reflecting the information of other sets of gene regulatory related data.

**7 Computational cost**

For a personal PC (8 x 3.2GHz core, 16GB ram), the proposed method took 2 hours to finish eQTL haplotype analysis for GTEx 338 whole blood samples for all genes.

**8 The selection of smoothing parameters for the regulatory prediction scores**

The smoothing parameters will mainly affect the size of the predicted regulatory regions and the total size of them. We calculated these two statistics from a set of fully processed finely-mapped chromatin states obtained from ENCODE, which were learned by integrating ChIP-seq data from nine cell lines using a Hidden Markov Model (ChromHMM). The average size of the regulatory regions is 1.25kb for the main eight regulatory states according to ChromHMM (promoters, enhancers and insulators), while they count for 4.1% of the whole genome. We tested different set of parameters of our smoothing method and calculated these two statistics accordingly as follows:

| parameter set | # of variants for variant average | # of variants for segmental average | shifting window size | average size | total size (% genome) | eHap genes found in whole blood tissue | Fraction of genes also found in set 0 |
| --- | --- | --- | --- | --- | --- | --- | --- |
| manuscript used. set0 | 10 | 10000 | 1000 | 1.32kb | 3.8% | 2372 | 100% |
| alt. set 1 | 5 | 5000 | 500 | 0.52kb | 1.8% | 2289 | 95% |
| alt. set 2 | 20 | 20000 | 2000 | 3.13kb | 5.1% | 2413 | 97% |
| alt. set 3 | 10 | 5000 | 500 | 0.87kb | 2.3% | 2324 | 95% |
| ChromHMM | - | - | - | 1.25kb | 4.1% | - |  |

The results shows that the parameter set used in the manuscript has the closest average size and total size comparing to ChromHMM dataset. In addition, we have calculated the number of eHap genes in the whole blood samples from GTEx (last column of the above table). The numbers do not change more than 5% against the original settings (1628), which demonstrated that the result is not sensitive to the choice of the parameters of the selection of the regulatory regions.

**9 The selection of haplotype working group size and correlation threshold for haplotype filtering**

The limit value of the size of the haplotype working group used in the manuscript is 10,000, it is the largest value that the computer in our lab can handle. We did sensitivity analysis by changing the value to 5,000, 2,000 and 1,000, by evaluating the number of eHap genes found in GTEx whole blood tissue. The result is as follows:

| Limit for haplotype working set | eHap genes found in whole blood tissue |
| --- | --- |
| 10,000 (manuscript used) | 2372 |
| 5,000 | 2203 |
| 2,000 | 1917 |
| 1,000 | 1531 |

The result showed that the number of eHap genes found significantly dropped when the number of haplotype working group limited to a lower value. The underlying reason is that many long eQTL haplotypes with tag SNPs relatively far away from each other (measured by the number of potential haplotypes between them) are filtered out during the analysis step. Therefore, we used the largest limit according to our computational power to get the highest sensitivity.

In the proposed method, we filtered out redundant haplotypes if it has high correlation (*r2*) to other informative haplotypes. The threshold used in the manuscript is 0.8. We also did sensitivity analysis on this threshold. The result is also measured by the number of eHap genes found in whole blood tissue in GTEx samples.

| Threshold for haplotype correlation (*r2*) | eHap genes found in whole blood tissue |
| --- | --- |
| 0.9 | 2365 |
| 0.8 (manuscript used) | 2372 |
| 0.7 | 2381 |
| 0.6 | 2367 |

According to the result, we can see that the number of eHap genes found in whole blood tissue was very stable and most of them are overlapped using different threshold (>99%). The underlying reason is the estimated number of independent test calculated in method 2.1.3 will keep stable, which also utilized the correlation between the informative haplotypes and 0.8 is a commonly used threshold for filtering out highly correlated markers in SNP analysis.

**10 Confirmation of eHap only genes do not contain eSNPs with marginal eSNPs**

To confirm that the additional discoveries of eHap only genes are not just due to a less stringent p-values, we did the following analysis for the whole blood GTEx samples: For all eHap only genes, we removed any of them as eHap only genes if it contains eQTL SNPs with p-value lower than the threshold used for eQTL haplotypes (t_hap) in each gene. Then we adjusted the threshold from t_hap to t_hap /0.05 and t_hap /0.01. The result is as follows:

|  | Use Original p-value | Use p-value/0.05 | Use p-value/0.01 |
| --- | --- | --- | --- |
| No. eHap only Genes | 735 | 725 | 683 |
| % reduced | - | 1.4% | 7.1% |

We can see that only 1.4% of genes removed from eHap only gene list when we lower down the threshold of p value by 0.05, and 7.1% by 0.01. The non-eHap-tag-SNPs do not relatively significant p-values.

Therefore, according to the eHap selection criteria and the demonstration analysis, we can conclude that the additional discoveries of eHap only genes are not just due to less stringent p-values.

**Figure S1: Variant regulatory scores of a 200kb region in chromosome 1.** A). Score before smoothing. B). Score after smoothing.


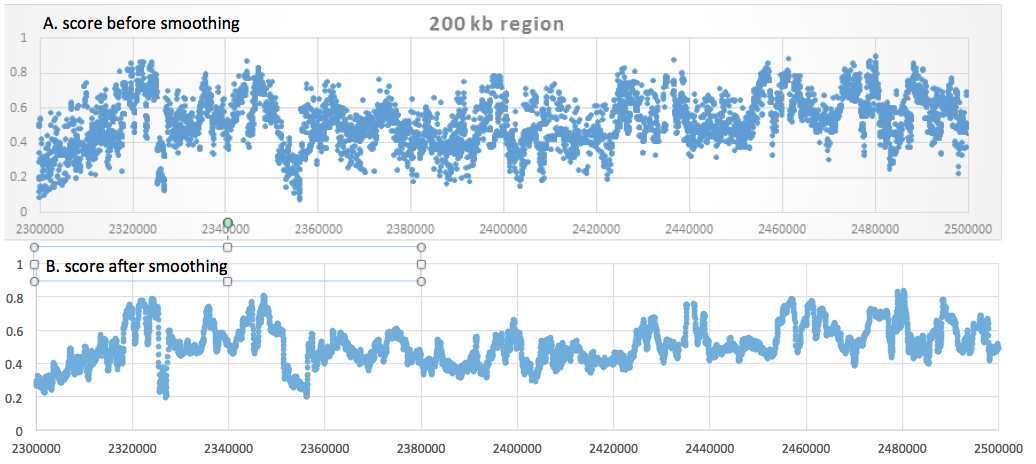


**Figure S2:** Comparison of different groups of eQTL haplotypes on their association with gene expression level, with their association with certain complex disease status. The measurement was on Spearman's rank correlation coefficient *r* and significance level *p.* A). eQTL haplotype from GTEx whole blood with Rheumatoid Arthritis (RA), a blood related disease. The x-axis is the log10 scaled p value of the association of the eQTL haplotype count with the located gene expression level. While the y-axis is the log10 scaled p value of the association of the eQTL haplotype count with the disease (RA) status. So it is showing the correlation of the two associations. B). eQTL haplotypes from GTEx brain tissue with RA. C). eQTL haplotype from GTEx whole bloods with randomly assigned RA status of the same set of data in A. D). eQTL haplotypes from GTEx brain tissue with Schizophrenia (SCZ), a brain related disease. E). eQTL haplotype from GTEx whole blood with SCZ. F). eQTL haplotype from GTEx brain tissue with randomly assigned SCZ status of the same set of data in D.

**Figure S3: QQ plot of the association p values for eQTL haplotype tag SNPs (black) vs. other SNPs (gray) in GWAS studies.** A). GTEx whole blood eQTL haplotype tag SNPs in WTCCC Rheumatoid Arthritis (RA) GWAS study. B. Whole blood eHap SNPs in RA meta study. C. Whole blood eHap SNPs vs regulatory SNP in RA meta study. D. Whole blood eHap SNPs in SCZ meta study. E-F). The same set of comparisons for GTEx brain eQTL haplotype tag SNPs in Schizophrenia GWAS.


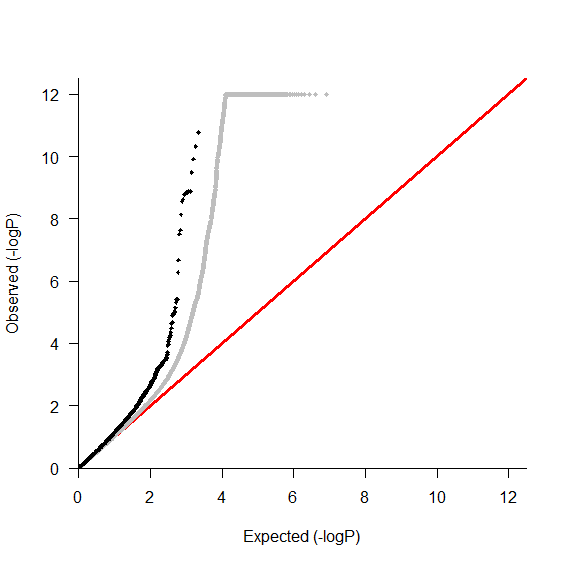

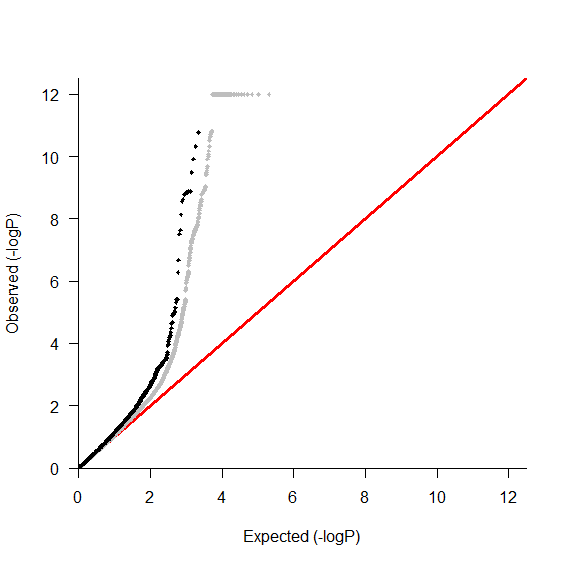


C. Whole blood eHap SNPs vs regulatory SNP in RA meta study


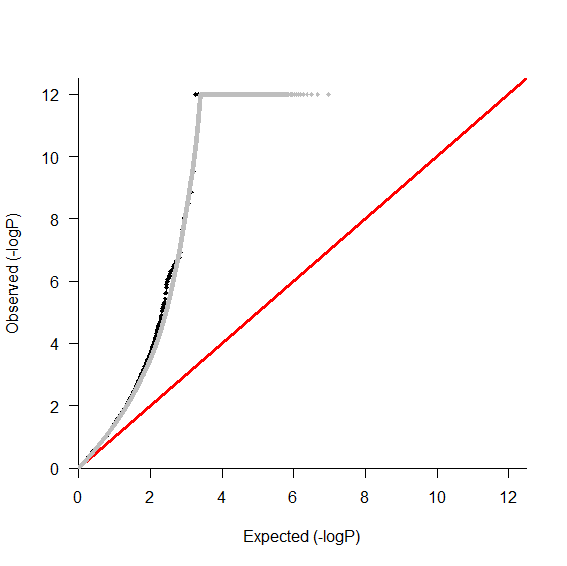


D. Whole blood eHap SNPs in SCZ meta study


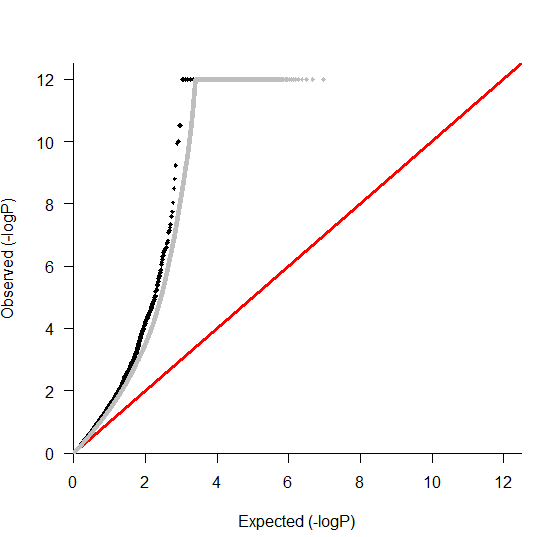

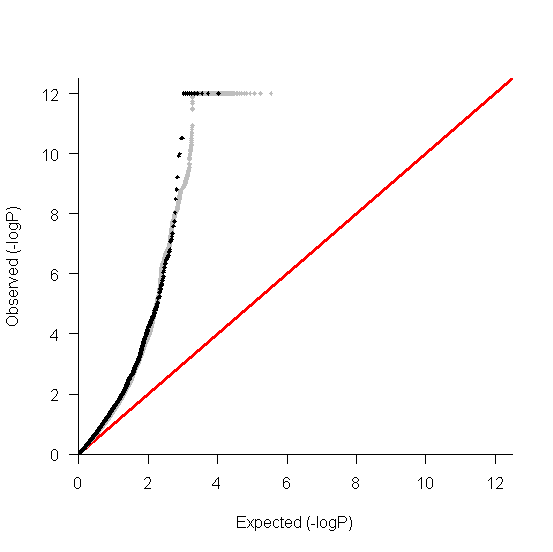


G. Brain eHap SNPs vs regulatory SNP in SCZ meta study


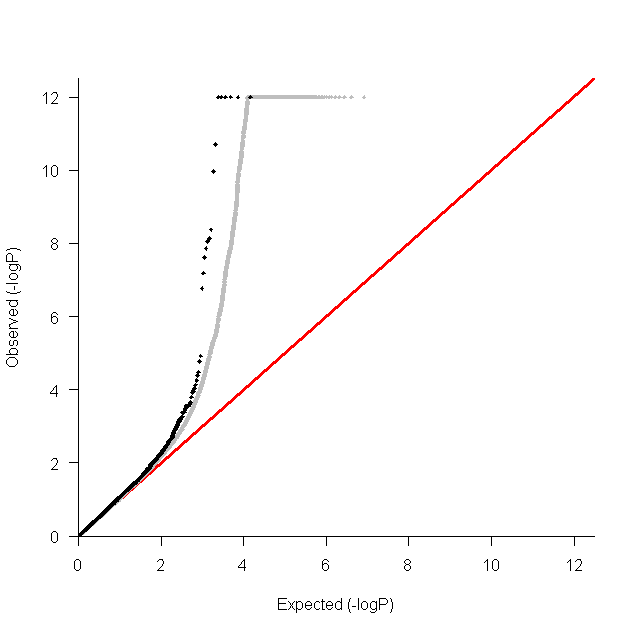

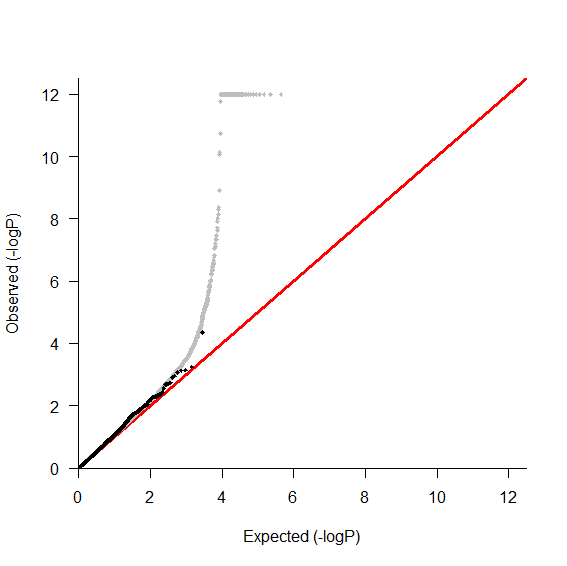


A. Whole blood eHap SNPs in WTCCC RA

B. Whole blood eHap SNPs in RA meta study

H. Brain eHap SNPs in RA meta study


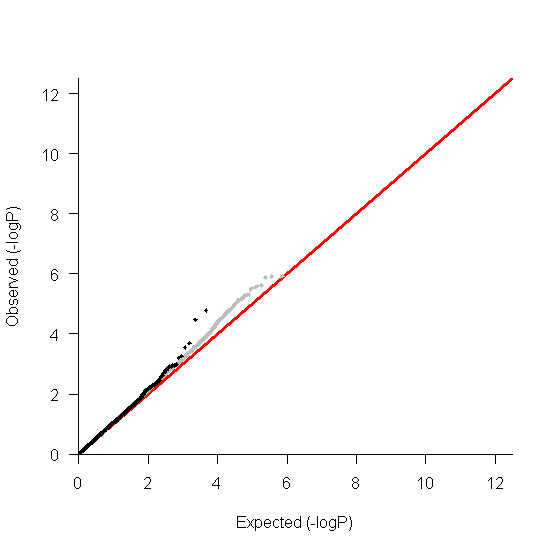


F. Brain eHap SNPs in SCZ meta study

K-S test, *p*=0.029

K-S test, *p*=2.2x10-16

K-S test, *p*=0.95

K-S test, *p*=6.9x10-8

K-S test, *p*=1.9x10-5

K-S test, *p*=3.2x10-8

K-S test, *p*=0.19

K-S test, *p*=0.0012

E. Brain eHap SNPs in GAIN SCZ study

**Figure S4:** An example of eQTL haplotype found in GTEx whole blood. A). All four tag SNPs of the eQTL haplotype are located in histone modification peak regions, annotated by Chip-seq from ENCODE. B). The number of the eQTL haplotype in each sample is counted and it is significantly associated with the normalized expression of the located gene, IRGM. C). The eQTL haplotype is also associated with Crohn’s disease according to the WTCCC dataset.

**Figure S5:** The Hi-C interaction plot of the region around CCL21. The Hi-C data is from GM12878, which is blood. The position of the tag SNPs of an eQTL haplotype of CCL21 is labeled with arrows. The outstanding interaction between the tag SNPs are highlighted by gray boxes. The url of this Hi-C data is as follows:

http://promoter.bx.psu.edu/hi-c/view.php?species=human&assembly=hg19&source=inside&tissue=GM12878&type=Lieberman-raw&resolution=10&c_url=&transfer=&chr=chr9&start=34100000&end=34600000&sessionID=&browser=none

**
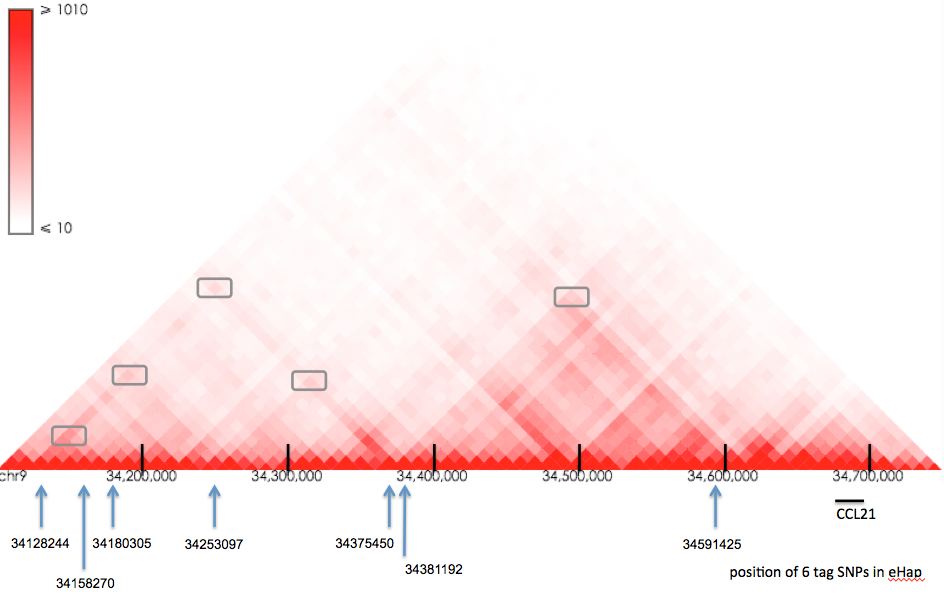
**

**Table S1:** Summary of genes with eQTL SNPs and eQTL haplotype in GTEx top ten sample size tissues and ten brain tissues generated from estimated regulatory regions (reg.) or random regions (ran.). The ratio of the number of eHap genes of the two methods was also calculated. On average, the number of eHap Genes is only 45% by using random regions rather than regulatory regions in top ten tissues. While it is 43% in ten brain tissues.

| **GTEx top ten sample size tissues** | **Sample Size** | **eSNP gene** | **reg. eHap gene** | **ran. eHap gene** | **ran. / rag.** |
| --- | --- | --- | --- | --- | --- |
| *Muscle_Skeletal* | 361 | 7079 | 1628 | 893 | 55% |
| *WholeBlood* | 338 | 6782 | 2372 | 1111 | 47% |
| *Skin_Sun_Exposed_Lower_leg* | 302 | 8558 | 2023 | 934 | 46% |
| *Adipose_Subcutaneous* | 298 | 8493 | 1648 | 584 | 35% |
| *Cells_Transformed_fibroblasts* | 292 | 8751 | 1547 | 644 | 42% |
| *Artery_Tibial* | 285 | 8050 | 1881 | 776 | 41% |
| *Lung* | 278 | 7224 | 1553 | 581 | 37% |
| *Thyroid* | 278 | 9916 | 1887 | 1015 | 54% |
| *Nerve_Tibial* | 256 | 9849 | 1859 | 824 | 44% |
| *Esophagus_Mucosa* | 241 | 7411 | 1588 | 810 | 51% |
| *Top ten tissue average* | 293 | 8211 | 1799 | 817 | 45% |
| **Ten brain tissues** |  |  |  |  |  |
| *Brain_Cerebellum* | 103 | 4162 | 1667 | 506 | 41% |
| *Brain_Caudate_basal_ganglia* | 100 | 2446 | 1226 | 849 | 51% |
| *Brain_Cortex* | 96 | 2566 | 1360 | 726 | 53% |
| *Brain_Nucleus_accumbens_basal_ganglia* | 93 | 2017 | 1046 | 438 | 42% |
| *Brain_Frontal_Cortex_BA9* | 92 | 2008 | 971 | 306 | 32% |
| *Brain_Cerebellar_Hemisphere* | 89 | 3249 | 1342 | 462 | 34% |
| *Brain_Putamen_basal_ganglia* | 82 | 1588 | 1033 | 359 | 40% |
| *Brain_Hippocampus* | 81 | 1134 | 893 | 422 | 48% |
| *Brain_Hypothalamus* | 81 | 1157 | 871 | 451 | 44% |
| *Brain_Anterior_cingulate_cortex_BA24* | 72 | 1211 | 837 | 331 | 40% |
| *Ten brain tissue average* | 89 | 2154 | 1125 | 485 | 43% |

**Table S2:** The enrichment of the chromatin states between the tag SNPs in alternative eQTL haplotypes from whole blood that generated from random regions rather than predicted critical regulatory regions. In total 8 combinations are positively enriched (ratio>1.2 and *p* < 10-5) and one combination is negatively enriched (ratio<0.8 and *p* < 10-5).

|  | | | | | |  |  |  |
| --- | --- | --- | --- | --- | --- | --- | --- | --- |
| chromatin state | Active Promoter | Weak Promoter | Inactive Promoter | Strong enhancer 5' | Strong enhancer 3' | Weak enhancer 5' | Weak enhancer 3' | Insulator |
| Active Promoter | 1.01 |  |  |  |  |  |  |  |
| Weak Promoter | **1.86(6.82)** | 1.17 |  |  |  |  |  |  |
| Inactive Promoter | 0.6 | 0.67 | 0.71 |  |  |  |  |  |
| Strong enhancer 5' | **1.21(12.47)** | 1.06 | 1.43(8.72) | **1.21(5.31)** |  |  |  |  |
| Strong enhancer 3' | 0.87 | 0.85 | 1.14 | **1.49(12.47)** | 1.24 |  |  |  |
| Weak enhancer 5' | 0.83 | 0.83(5.12) | 1.17 | 0.96 | **1.52(12.47)** | 0.77 |  |  |
| Weak enhancer 3' | 0.83 | 0.61 | 1.28 | 1.06 | 0.87 | 1.13 | 1.17 |  |
| Insulator | **1.33(12.47)** | 1.15 | 0.73 | 1.07 | 0.8 | 0.98 | 0.69(9.86) | **1.52(10.44)** |
